# Supplementary material for: Synthesis and biological evaluation of novel fluorinated anticancer agents incorporating the indolin-2-one moiety
Source: Royal Society of Chemistry journal article supplement (doi:10.1039/c5ra19617e), 2015-01-01
Supplement: c5ra19617e1.pdf [file c5ra19617e1.pdf]

## Supporting Information

### 1. Synthesize compounds

#### 1.1 Materials and instruments

<sup>1</sup>H and <sup>13</sup>C NMR spectra were recorded on Bruker DRX 500 MHz spectrometers with tetramethylsilane (TMS) as the internal standard (Bruker, Bremerhaven, Germany). MS and HRMS spectra were determined on a LCMS-IT-TOF mass spectrometer (Shimadzu, Kyoto, Japan). Column chromatography (CC): silica gel (200–300 mesh; Qingdao Makall Group CO., LTD; Qingdao; China). All reactions were monitored using thin-layer chromatography (TLC) on silica gel plates. Reaction reagents were purchased from J&K Scientific Ltd. Organic solvents were analytical reagent grade and purchased from Tianjin Chemical Reagent Co., Ltd. The synthesized compounds were named using ChemBioDraw Ultra software (v 12.0)

#### 1.2 General procedure for the preparation of derivatives (6-14)

To a 100 ml flask charged with chlorosulfonic acid (25 mL) was added slowly 2-oxindole (50 mmol) at 0 °C. After the addition, the reaction mixture was stirred at room temperature for 1.5 h. And then, the reaction mixture was heated to 68 °C for 1 h, cooled, and poured into ice water (200 mL). The precipitate was washed with water and dried in a vacuum oven to give 5-chlorosulfonyl-2-oxindole (**2**) which was used without further purification.

A mixture of 5-chlorosulfonyl-2-oxindole (5 mmol) and appropriate amine (10 mmol) in tetrahydrofuran (THF, 50 mL) was heated to refluxing and stirred for 3 h. And then, this mixture was concentrated under reduced pressure, and HCl (pH = 3, 25 mL) was added and stirred for 15 minutes. The crude product was filtered, washed with ice water (100 mL) and dried in a vacuum oven to give 5-sulfonylamido-2-oxindole (**3-5**) which was used without further purification.

To a mixture of compound **3**(or **4** or **5**) (0.5 mmol) and appropriate aldehyde (0.55 mmol) in ethanol (5 mL) was added piperidine (50 μL). The reaction mixture was heated to refluxing and stirred for 2 h, and TLC analysis indicated when the reaction was complete. The crude product was filtered, washed with ethanol and dried in a vacuum (if no solid precipitated, the crude product was chromatographed using a silica gel column) to afford the title compounds **6-14** as a yellow solid.

**3 - (3, 5 - bis(trifluoromethyl)benzylidene) - N - (4 - bromophenyl) - 2 - oxindoline - 5 - sulfonamide (6)**

<sup>1</sup>H NMR (Acetone-*d*<sub>6</sub>, 500 MHz, ppm): δ 10.17(s, 1H), 9.13(s, 1H), 8.38(s, 1H), 8.18(s, 1H), 8.12(s, 1H), 7.74(d, 1H, *J* = 8.0Hz), 7.42(d, 2H, *J* = 8.5Hz), 7.20(d, 2H, *J* = 8.5Hz), 7.07(d, 1H, *J* = 8.0Hz); <sup>13</sup>C NMR (Acetone-*d*<sub>6</sub>, 125 MHz, ppm): δ 166.7, 145.0, 137.7, 136.0, 135.0, 132.9, 132.1(2C), 131.9(2C), 131.1(2C), 129.4, 128.7, 124.8, 123.4(2C), 122.6(2C), 122.3, 119.6, 116.7, 110.0; ESIMS: *m/z* 588 [M-H]<sup>-</sup> HRESIMS: calc for C<sub>23</sub>H<sub>12</sub>F<sub>6</sub>BrN<sub>2</sub>O<sub>3</sub>S [M-H]<sup>-</sup> 588.9648, found 588.9662

**N-(4-bromophenyl)-3-(3,4-difluorobenzylidene)-2-oxoindoline-5-sulfonamide (7)**

<sup>1</sup>H NMR (DMSO-*d*<sub>6</sub>, 500 MHz, ppm): δ 11.17(s, 1H), 10.34(s, 1H), 8.00(s, 1H), 7.71(s, 1H), 7.54-7.65(overlap, 2H), 7.37-7.44(overlap, 3H), 7.06(d, 2H, *J* = 8.5Hz), 7.00(d, 1H, *J* = 8.5Hz), 6.96(d, 2H, *J* = 8.5Hz); <sup>13</sup>C NMR (DMSO-*d*<sub>6</sub>, 125MHz): ppm δ 167.5, 150.0, 149.2, 144.8, 137.7, 136.4, 132.0, 132.4(2C), 130.0, 126.8, 128.7, 125.2, 122.4(2C), 122.2, 121.1, 119.0, 117.9, 116.4, 111.0; ESIMS: *m/z* 488 [M-H]<sup>-</sup> HRESIMS: calc for C<sub>21</sub>H<sub>12</sub>F<sub>2</sub>BrN<sub>2</sub>O<sub>3</sub>S [M-H]<sup>-</sup> 488.9722, found 488.9726.

**(E)-N-(4-bromophenyl)-3-(3-fluoro-4-hydroxybenzylidene)-2-oxoindoline-5-sulfonamide (8)**

<sup>1</sup>H NMR (DMSO-*d*<sub>6</sub>, 500 MHz, ppm): δ 9.94(s, 1H), 9.16(s, 1H), 8.39(s, 1H), 8.12(s, 1H), 7.94(s, 1H), 7.72-7.76(overlap, 3H), 7.42(d, 2H, *J* = 8.5Hz), 7.32(d, 1H, *J* = 8.5Hz), 7.26(d, 1H, *J* = 8.5Hz); <sup>13</sup>C NMR (DMSO-*d*<sub>6</sub>, 125MHz, ppm): δ 167.9, 153.0, 151.1, 146.0, 143.0, 140.4, 138.5, 133.6, 132.1(2C), 132.0, 128.5, 126.8, 122.1(2C), 122.3, 120.4, 119.7, 117.4, 116.0, 110.4; ESIMS: *m/z* 488 [M+H]<sup>+</sup> HRESIMS: calc for C<sub>21</sub>H<sub>14</sub>FBrN<sub>2</sub>O<sub>4</sub>S [M+H]<sup>+</sup> 488.99948, found 488.9914.

**(E)-3-(3,5-bis(trifluoromethyl)benzylidene)-5-(morpholinosulfonyl)indolin-2-one (9)**

<sup>1</sup>H NMR (DMSO-*d*<sub>6</sub>, 500 MHz, ppm): δ 10.24(s, 1H), 8.43(s, 1H), 8.29(s, 1H), 8.16(s, 1H), 8.13(s, 1H), 7.74(d, 1H, *J* = 8.0Hz), 7.20(d, 1H, *J* = 8.0Hz), 3.68(t, 4H, *J* = 4.5Hz), 2.98(t, 4H, *J* = 4.5Hz); <sup>13</sup>C NMR (DMSO-*d*<sub>6</sub>, 125 MHz, ppm): δ 166.8, 145.2, 137.5, 136.1, 135.3, 132.1, 130.3, 128.5(2C), 125.1, 123.4, 122.4(2C), 122.1, 120.2(2C), 110.0, 65.7(2C), 46.2(2C); ESIMS: *m/z* 507 [M+H]<sup>+</sup> HRESIMS: calc for C<sub>21</sub>H<sub>16</sub>F<sub>6</sub>BN<sub>2</sub>O<sub>4</sub>S [M+H]<sup>+</sup> 507.0808, found 507.0849.

**(E)-3-(3,4-difluorobenzylidene)-5-(morpholinosulfonyl)indolin-2-one (10)**

<sup>1</sup>H NMR (DMSO-*d*<sub>6</sub>, 500 MHz, ppm): δ 10.08(s, 1H), 8.01(s, 1H), 7.72(s, 1H), 7.62-7.69(overlap, 2H), 7.13-7.18(overlap, 2H), 7.00(d, 1H, *J* = 8.5Hz), 3.69(t, 4H, *J* = 4.5Hz), 2.96(t, 4H, *J* = 4.5Hz); <sup>13</sup>C NMR (DMSO-*d*<sub>6</sub>, 125MHz): ppm δ 167.3, 152.7, 146.4, 143.6, 138.9,

131.4, 129.8, 128.4, 126.4, 122.1, 121.8, 119.6, 118.9, 110.0, 109.3, 65.7(2C), 46.3(2C); ESIMS:  $m/z$  405 [M-H]<sup>-</sup> HRESIMS: calc for C<sub>19</sub>H<sub>16</sub>F<sub>2</sub>N<sub>2</sub>O<sub>4</sub>S [M-H]<sup>-</sup> 405.0886, found 405.0726.

**(E)-3-(3-fluoro-4-hydroxybenzylidene)-5-(morpholinosulfonyl)indolin-2-one (11)**

<sup>1</sup>H NMR (Pyridine-*d*<sub>5</sub>, 500 MHz, ppm): δ 11.34(s, 1H), 7.20(s, 1H), 6.94(s, 1H), 6.64(d, 1H, *J*= 8.5Hz), 6.48(d, 1H, *J*= 8.5Hz), 6.37(s, 1H), 6.07(d, 1H, *J*= 8.5Hz), 5.95(d, 1H, *J*= 8.5Hz), 2.37(t, 4H, *J*= 4.0Hz), 1.87(t, 4H, *J*= 4.0Hz); <sup>13</sup>C NMR (Pyridine-*d*<sub>5</sub>, 125MHz): ppm δ 167.4, 151.5, 149.1, 143.7, 138.2, 130.8, 128.8, 127.5, 126.6, 122.4, 121.9, 119.2, 118.1, 116.6, 108.3, 64.8(2C), 45.2(2C); ESIMS:  $m/z$  405 [M+H]<sup>+</sup> HRESIMS: calc for C<sub>19</sub>H<sub>17</sub>FN<sub>2</sub>O<sub>5</sub>S [M+H]<sup>+</sup> 405.0992, found 405.0915.

**(E)-3-(3,5-bis(trifluoromethyl)benzylidene)-5-((4-(pyrimidin-2-yl)piperazin-1-yl)sulfonyl)indolin-2-one (12)**

<sup>1</sup>H NMR (DMSO-*d*<sub>6</sub>, 500 MHz, ppm): δ 11.23 (s, 1H), 8.31 (s, 2H), 8.29(d, 2H, *J*= 4.5 Hz), 8.18 (s, 1H), 8.13 (s, 1H), 7.64(d, 1H, *J*= 8.0Hz), 7.04 (d, 1H, *J*= 8.0Hz), 6.60 (t, 1H, *J*=4.5Hz), 3.84 (t, 4H, *J*= 4.5Hz), 2.95 (t, 4H, *J*= 4.5Hz); <sup>13</sup>C NMR (DMSO-*d*<sub>6</sub>, 125MHz, ppm): δ 167.4, 161.2, 158.4(2C), 145.6, 136.2, 136.0, 132.6(2C), 130.8(2C), 130.5, 128.9, 127.9, 125.3, 122.6(2C), 121.8, 120.5, 111.1, 110.5, 46.2(2C), 42.9(2C); ESIMS:  $m/z$  584 [M+H]<sup>+</sup> HRESIMS: calc for C<sub>25</sub>H<sub>19</sub>F<sub>6</sub>N<sub>5</sub>O<sub>3</sub>S [M+H]<sup>+</sup> 584.1271, found 584.1186.

**(E)-3-(3,4-difluorobenzylidene)-5-((4-(pyrimidin-2-yl)piperazin-1-yl)sulfonyl)indolin-2-one (13)**

<sup>1</sup>H NMR (DMSO-*d*<sub>6</sub>, 500 MHz, ppm): δ 11.20 (s, 1H), 8.29(d, 2H, *J*= 4.5 Hz), 8.09-8.11 (overlap, 3H), 7.59-7.70(overlap, 3H), 7.01 (d, 1H, *J*= 8.0Hz), 6.59 (t, 1H, *J*=4.5Hz), 3.82 (t, 4H, *J*= 4.5Hz), 2.94 (t, 4H, *J*= 4.5Hz); <sup>13</sup>C NMR (DMSO-*d*<sub>6</sub>, 125MHz, ppm): δ 167.6, 161.2, 158.4(2C), 150.2, 147.3, 145.0, 137.9, 130.8(2C), 129.8, 127.7, 125.7, 121.8, 120.0, 111.1, 111.0, 110.2, 46.2(2C), 42.9(2C); ESIMS:  $m/z$  484 [M+H]<sup>+</sup> HRESIMS: calc for C<sub>23</sub>H<sub>19</sub>F<sub>2</sub>N<sub>5</sub>O<sub>3</sub>S [M+H]<sup>+</sup> 484.1289, found 484.1249.

**(E)-3-(3-fluoro-4-hydroxybenzylidene)-5-((4-(pyrimidin-2-yl)piperazin-1-yl)sulfonyl)indolin-2-one (14)**

<sup>1</sup>H NMR (Pyridine-*d*<sub>5</sub>, 500 MHz, ppm): δ 11.30 (s, 1H), 7.21(s, 1H), 7.11(d, 2H, *J*= 4.5 Hz), 7.01 (d, 1H, *J*= 8.0Hz), 6.95(s, 1H), 6.64 (d, 1H, *J*= 8.0Hz), 6.37(s, 1H), 6.11 (d, 1H, *J*= 8.0Hz), 5.92 (d, 1H, *J*= 8.0Hz), 5.22 (t, 1H, *J*=4.5Hz), 2.78 (t, 4H, *J*= 4.5Hz), 1.94 (t, 4H, *J*= 4.5Hz); <sup>13</sup>C

NMR (Pyridine-*d*<sub>5</sub>, 125MHz, ppm):  $\delta$  167.4, 160.2, 156.7(2C), 148.8, 143.7, 138.2, 134.4, 130.8, 127.4, 126.3, 125.8, 124.9, 122.4, 121.5, 121.0, 118.0, 109.4, 108.3, 45.2(2C), 41.7(2C); ESIMS: *m/z* 482 [M+H]<sup>+</sup> HRESIMS: calc for C<sub>23</sub>H<sub>20</sub>FN<sub>5</sub>O<sub>4</sub>S [M+H]<sup>+</sup> 482.1302, found 482.1293.

## **2. Anticancer activities assays**

### **2.1. Materials**

Dulbecco's modified Eagle's medium (DMEM), fetal bovine serum (FBS), and other cell culture reagents were purchased from Invitrogen (Carlsbad, CA, USA). The antibodies directed against caspase-3, 9, Bcl-2, Bax and p53 were purchased from Cell Signaling Technology (Danvers, MA, USA). The antibody directed against GAPDH was purchased from Abcam Trading Company Ltd (Shanghai, China). The high concentration Matrigel was purchased from BD Biosciences (Bedford, MA, USA). A NO detection kit was purchased from Applygen (Beijing, China). All the other reagents were purchased from Sigma, unless otherwise indicated.

### **2.2. Cell Culture and Proliferation Assay**

The cells including Human lung cancer cell line, A549; Human hepatoma cell lines, Bel-7402 and HepG2; human cervical cancer cell line, HeLa; human colon cancer cell line, HCT116 and Human umbilical vein endothelial cells, HUVECs were purchased from BOSTER, Ltd (Wuhan, China). The cells were maintained in DMEM supplemented with 10% FBS and 1% antibiotics at 37°C and in an atmosphere containing 5% CO<sub>2</sub>. The cells were split 1:3 when they reached 80%–90% confluence. Cell proliferation was measured using the 3-(4, 5-dimethylthiazol-2-yl)-2, 5-diphenyltetrazolium bromide (MTT) colorimetric assay.

The cells ( $4 \times 10^3$  cells/well) with 10% FBS culture medium were seeded in a 96-well plate and incubated overnight. Next, the cells were treated with various amounts of compounds and incubated for 48 h. Subsequently, 20  $\mu$ L of 5-mg/mL MTT was transferred into each well, and the cells were incubated for another 4 h. The medium in each well was carefully removed, and 150  $\mu$ L DMSO was then added to each well. The samples were thoroughly agitated for 10 min on a shaker. Finally, the absorbance of the samples at 490 and 690 nm was measured against a background control (blank) using a microplate reader.

### **2.3. Wound Healing Assay**

Briefly, the exponentially growing HUVECs ( $2.5 \times 10^5$  cells per well) were cultured in 6-well plates and starved overnight in 2% FBS medium until they reached 90% confluence. A single wound was then scratched in the center of the cell monolayers with a 200  $\mu$ L sterile plastic pipette tip. The wounded monolayers were washed twice with  $1 \times$  PBS to remove the non-adherent cells and were incubated with various concentrations of compound 6 for 24 h in the presence of 1  $\mu$ g/mL of mitomycin C (for mitotic inactivation). To measure the length of the endothelial cells that had migrated from the edge of the injured monolayer, images were obtained immediately after wounding and after a 24 h incubation period, using a phase-contrast microscope (Olympus, Tokyo, Japan). The length was measured by the Image Pro Plus v 6.0 software (Media Cybernetics, Inc., Bethesda, MD, USA).

#### **2.4. Capillary-Like Tube Formation Assay**

Briefly, high concentration Matrigel was added to a 96-well plate (50  $\mu$ L per well) and allowed to polymerize for 1 h at 37 °C. The HUVECs ( $5.5 \times 10^4$  cells per well, 200  $\mu$ L per well) with or without compound 6, were seeded onto the surface of the Matrigel. After a 7 h incubation period, cellular morphological changes and tubular structure formation were observed under a phase-contrast microscope (Olympus). The images were captured and the degree of tube formation was quantified by measuring the lengths of the tubes using the Image Pro Plus v 6.0 software.

#### **2.5. Immunoblotting Analysis**

Briefly, the HepG2 cells ( $2 \times 10^5$  cells per well) were cultured in 6-well plates. When they reached 80% confluence, the cells were treated with various concentrations of compound 6 for 12 h. Then the cells were washed with ice-cold PBS and lysed with lysis buffer (50 mM Tris-HCl, 1% Triton X-100, 0.5% sodium deoxycholate, 150 mM NaCl, 1 mM EDTA, 1 mM phenylmethylsulfonyl fluoride (PMSF), 1-mM sodium orthovanadate, 1 mM NaF, and 0.2% protease inhibitor cocktail; pH 7.2). Proteins were separated by sodium dodecyl sulfate-polyacrylamide gel electrophoresis and were subsequently transferred to nitrocellulose membranes. The membranes were blocked with 5% skim milk in  $1 \times$  Tris-buffered saline containing 0.1% Tween 20 (TBST) for 1 h at room temperature and were then incubated overnight at 4 °C with a primary antibody. The following day, the membranes were washed with TBST and were probed with a secondary antibody. The bands were detected using enhanced chemiluminescence reagents (Thermo Fisher Scientific Inc., Shanghai, China).

## 2.6. NO Measurement

One means to investigate nitric oxide formation is to measure nitrite ( $\text{NO}^{2-}$ ), which is one of two primary, stable and nonvolatile breakdown products of NO. The NO levels in the HUVECs were measured with the  $\text{NO}^{2-}$  detection kit. Briefly, the HUVECs were cultured in 24 wells plates ( $1 \times 10^5$  cells per well). After overnight incubation, the cells were starved for 16 h in 2% FBS containing medium. Then, the cells were exposed to 20% FBS containing medium with or without **compound6**. Twenty-four hours later, the supernatant was collected, and NO production was determined following the protocol supplied with the kit (Applygen, Beijing, China).

## 2.7. Statistical Analysis

All the experiments were performed at least three times, and the data are presented as mean  $\pm$  SD values. Differences between the mean values were assessed using one-way analysis of variance. For all the analyses,  $p < 0.05$  was considered significant. Statistical analyses were performed using SPSS 17.0 (SPSS, Inc., Chicago, IL, USA).

## References

- [1] Zheng, G.-h.; Shen, J.-j.; Zhan, Y.-c.; Yi, H.; Xue, S.-t.; Wang, Z.; Ji, X.-y.; Li, Z.-r. *Eur. J. Med. Chem.* **2014**, *81*, 277.
- [2] Astin, J. W.; Batson, J.; Kadir, S.; Charlet, J.; Persad, R. A.; Gillatt, D.; Oxley, J. D.; Nobes, C. D. *Nat. Cell. Biol.* **2010**, *12*, 1194.

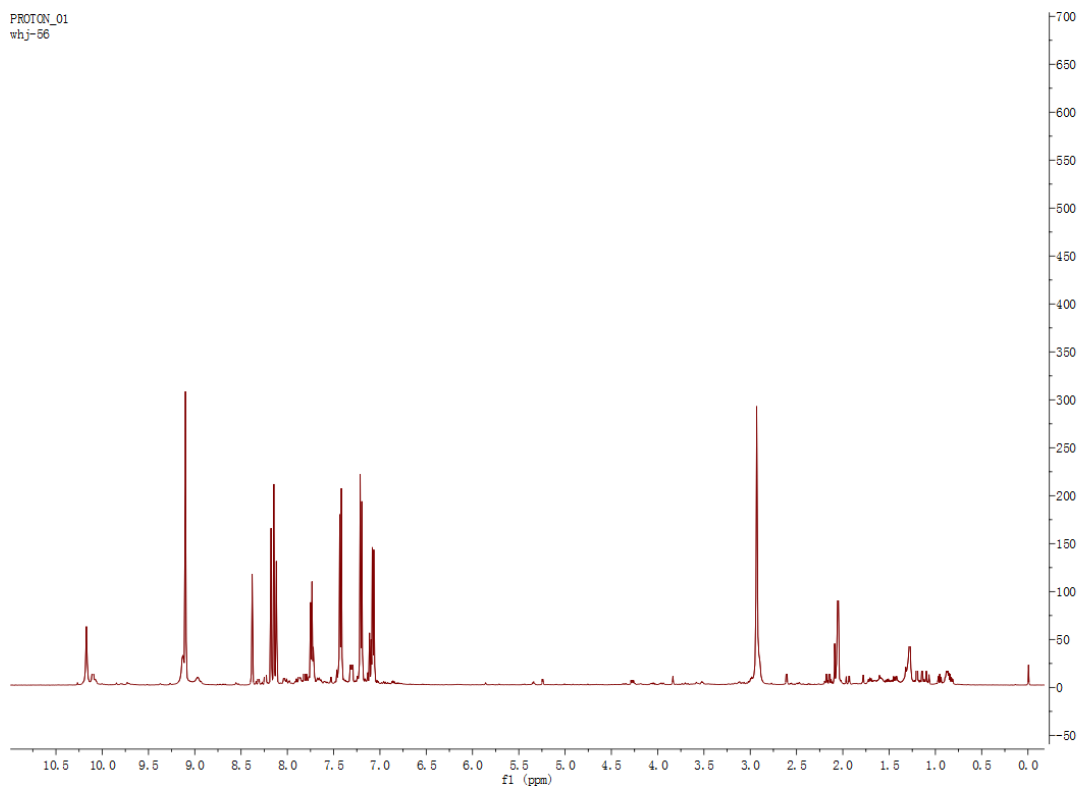

Compound 6  $^1\text{H}$  NMR

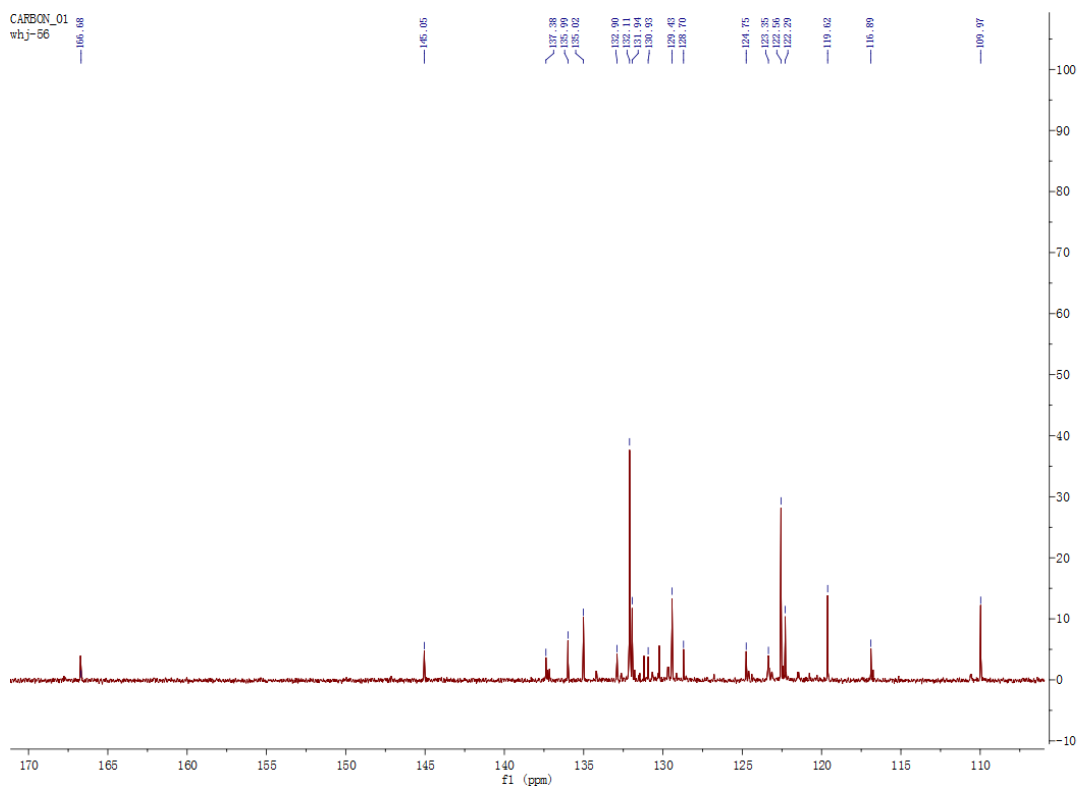

Compound 6  $^{13}\text{C}$  NMR

Data File: E:\MS-分析\分子量测定\2014-08-28\2014-08-22MS\_W-56\_38.lcd

| Elmt | Val. | Min | Max | Elmt | Val. | Min | Max | Elmt | Val. | Min | Max | Use Adduct |
|------|------|-----|-----|------|------|-----|-----|------|------|-----|-----|------------|
| H    | 1    | 0   | 300 | O    | 2    | 0   | 50  | Cl   | 1    | 0   | 0   | H          |
| C    | 4    | 0   | 100 | F    | 1    | 0   | 6   | Br   | 1    | 0   | 4   |            |
| N    | 3    | 2   | 5   | S    | 2    | 0   | 1   |      |      |     |     |            |

Error Margin (mDa): 20.0  
 HC Ratio: unlimited  
 Max Isotopes: all  
 MSn Iso RI (%): 75.00

DBE Range: not fixed  
 Apply N Rule: yes  
 Isotope RI (%): 1.00  
 MSn Logic Mode: AND

Electron Ions: both  
 Use MSn Info: no  
 Isotope Res: 10000  
 Max Results: 500

Event#: 2 MS(E-) Ret. Time : 0.170 -> 0.380 Scan#: 36 -> 78

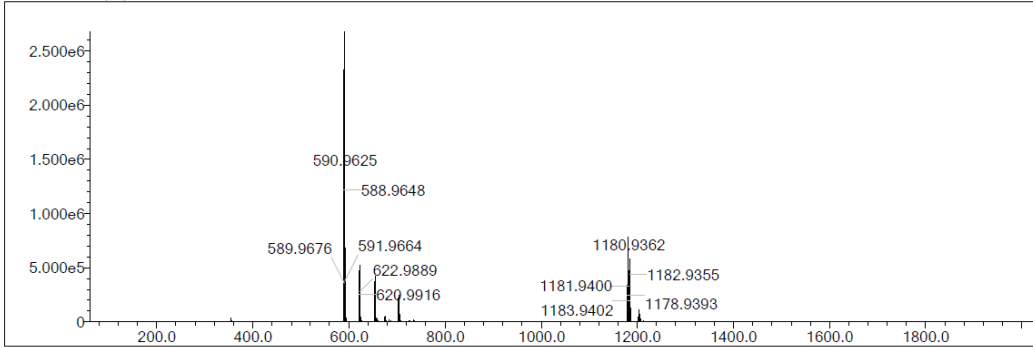

Measured region for 588.9648 m/z

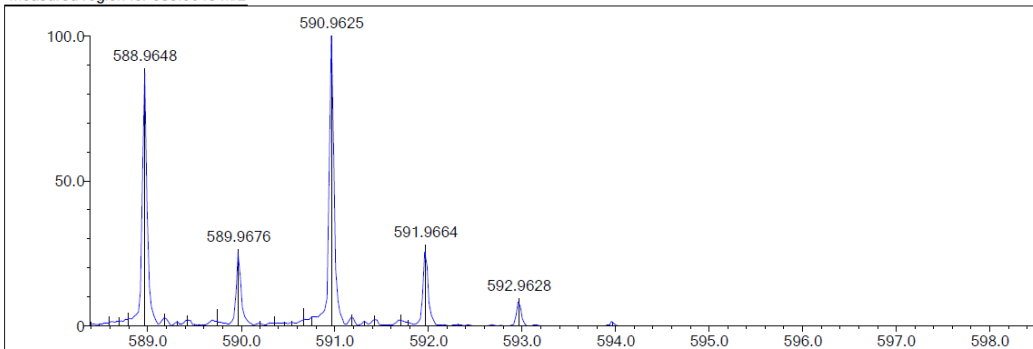

C23 H13 N2 O3 F6 S Br [M-H]- : Predicted region for 588.9662 m/z

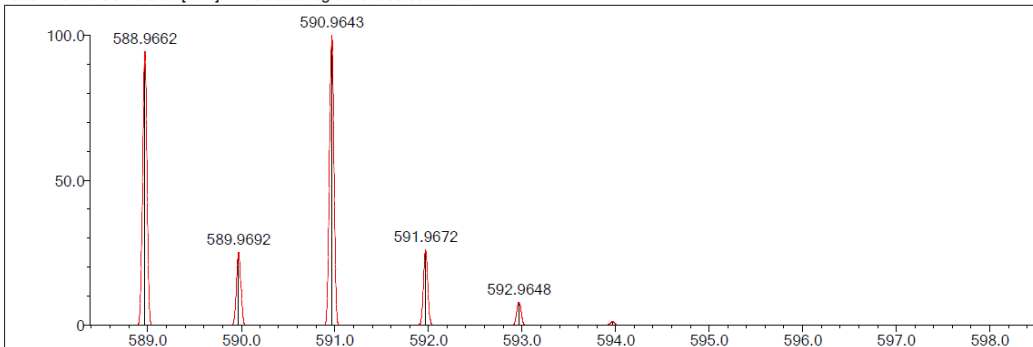

| Rank | Score | Formula (M)           | Ion    | Meas. m/z | Pred. m/z | Df. (mDa) | Df. (ppm) | Iso   | DBE  |
|------|-------|-----------------------|--------|-----------|-----------|-----------|-----------|-------|------|
| 4    | 76.96 | C23 H13 N2 O3 F6 S Br | [M-H]- | 588.9648  | 588.9662  | -1.4      | -2.38     | 79.71 | 15.0 |

Compound 6 HR MS



Data File: E:\MS-分析\分子量测定\2014-08-28\2014-08-22MS\_W-57\_39.lcd

| Elmt | Val. | Min | Max | Elmt | Val. | Min | Max | Elmt | Val. | Min | Max | Use Adduct |
|------|------|-----|-----|------|------|-----|-----|------|------|-----|-----|------------|
| H    | 1    | 0   | 300 | O    | 2    | 0   | 50  | Cl   | 1    | 0   | 0   | H          |
| C    | 4    | 0   | 100 | F    | 1    | 0   | 6   | Br   | 1    | 0   | 4   |            |
| N    | 3    | 2   | 5   | S    | 2    | 0   | 1   |      |      |     |     |            |

Error Margin (mDa): 20.0  
 HC Ratio: unlimited  
 Max Isotopes: all  
 MSn Iso RI (%): 75.00

DBE Range: not fixed  
 Apply N Rule: yes  
 Isotope RI (%): 1.00  
 MSn Logic Mode: AND

Electron Ions: both  
 Use MSn Info: no  
 Isotope Res: 10000  
 Max Results: 500

Event#: 2 MS(E-) Ret. Time : 0.180 -> 0.300 Scan#: 38 -> 62

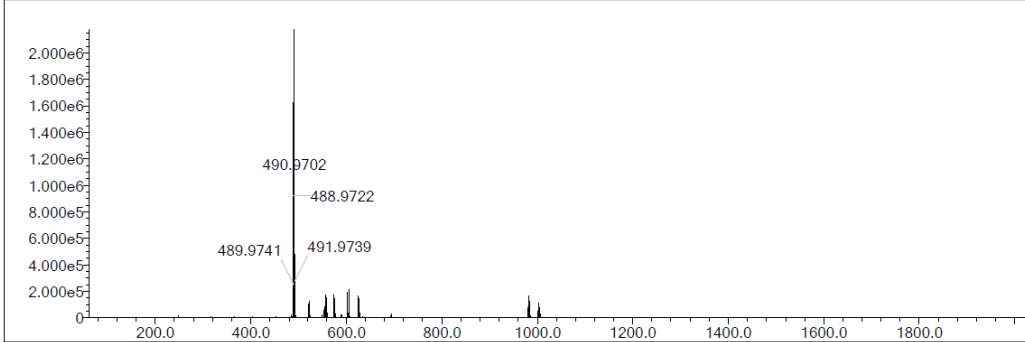

Measured region for 488.9722 m/z

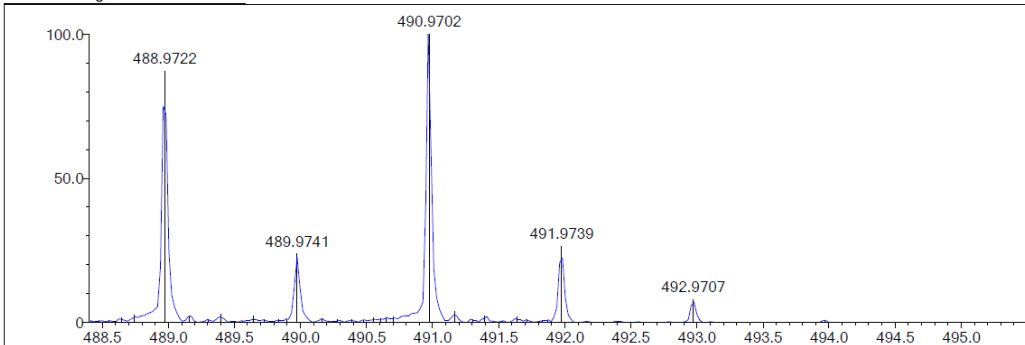

C21 H13 N2 O3 F2 S Br [M-H]- : Predicted region for 488.9726 m/z

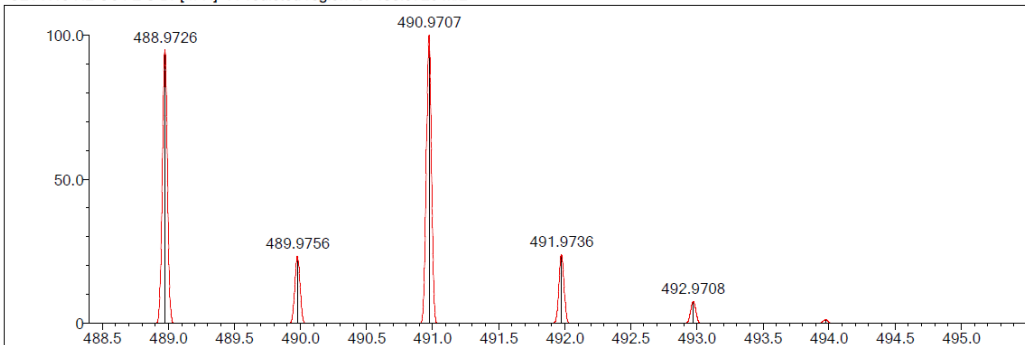

| Rank | Score | Formula (M)           | Ion    | Meas. m/z | Pred. m/z | Df. (mDa) | Df. (ppm) | Iso   | DBE  |
|------|-------|-----------------------|--------|-----------|-----------|-----------|-----------|-------|------|
| 3    | 65.61 | C21 H13 N2 O3 F2 S Br | [M-H]- | 488.9722  | 488.9726  | -0.4      | -0.82     | 65.61 | 15.0 |

Compound 7 HR MS

Data File: D:\分子量测定\2015\2015-01-25\2015-01-25WLJ\_58\_13.lcd

| Elmt | Val. | Min | Max | Use Adduct |
|------|------|-----|-----|------|------|-----|-----|------|------|-----|-----|------|------|-----|-----|------------|
| H    | 1    | 0   | 100 | N    | 3    | 0   | 6   | P    | 3    | 0   | 0   | Br   | 1    | 0   | 2   | H          |
| B    | 3    | 0   | 0   | O    | 2    | 0   | 50  | S    | 2    | 0   | 1   | I    | 3    | 0   | 0   |            |
| C    | 4    | 19  | 50  | F    | 1    | 0   | 6   | Cl   | 1    | 0   | 0   |      |      |     |     |            |

Error Margin (mDa): 20.0  
 HC Ratio: 0.0 - 3.0  
 Max Isotopes: all  
 MSn Iso RI (%): 75.00

DBE Range: 0.0 - 30.0  
 Apply N Rule: yes  
 Isotope RI (%): 1.00  
 MSn Logic Mode: OR

Electron Ions: both  
 Use MSn Info: yes  
 Isotope Res: 10000  
 Max Results: 800

Event#: 1 MS(E+) Ret. Time : 0.170 -> 0.360 Scan# : 35 -> 73

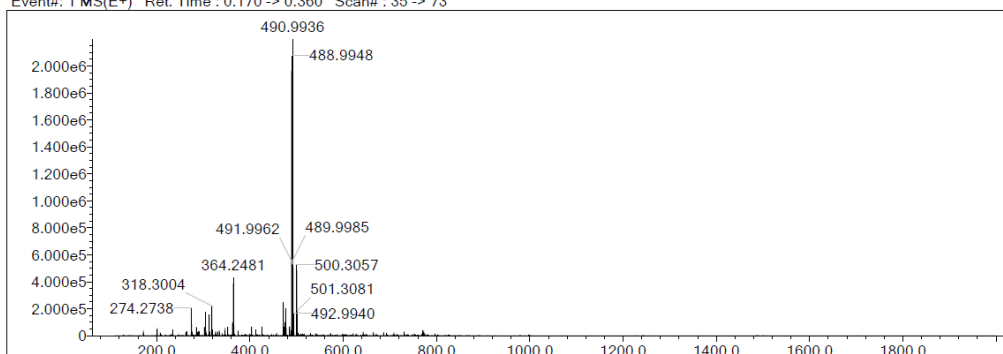

Measured region for 488.9948 m/z

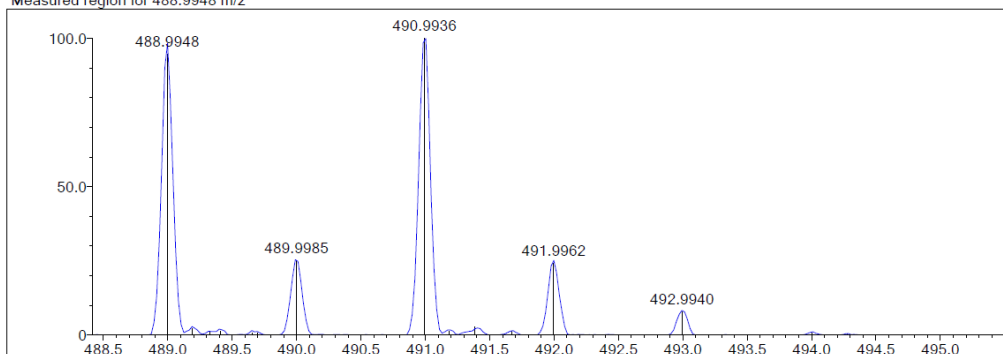

C21 H14 N2 O4 F S Br [M+H]+ : Predicted region for 488.9914 m/z

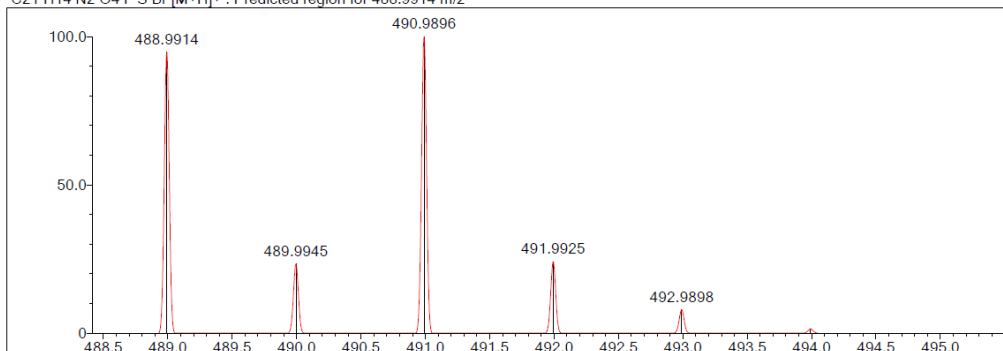

| Rank | Score | Ion                | Formula (M)          | Pred. m/z | Meas. m/z | Df. (mDa) | Df. (ppm) | Iso   | DBE  |
|------|-------|--------------------|----------------------|-----------|-----------|-----------|-----------|-------|------|
| 16   | 70.23 | [M+H] <sup>+</sup> | C21 H14 N2 O4 F S Br | 488.9914  | 488.9948  | 3.4       | 6.95      | 99.61 | 15.0 |

### Compound 8 HR MS

Data File: D:\分子量测定\2015\2015-01-25\2015-01-25WLJ\_61B\_14.Icd

| Elmt | Val. | Min | Max | Use Adduct |
|------|------|-----|-----|------|------|-----|-----|------|------|-----|-----|------|------|-----|-----|------------|
| H    | 1    | 0   | 100 | N    | 3    | 0   | 6   | P    | 3    | 0   | 0   | Br   | 1    | 0   | 2   | H          |
| B    | 3    | 0   | 0   | O    | 2    | 0   | 50  | S    | 2    | 0   | 1   | I    | 3    | 0   | 0   |            |
| C    | 4    | 19  | 50  | F    | 1    | 0   | 6   | Cl   | 1    | 0   | 0   |      |      |     |     |            |

Error Margin (mDa): 20.0  
 DBE Range: 0.0 - 30.0  
 Electron Ions: both  
 HC Ratio: 0.0 - 3.0  
 Apply N Rule: yes  
 Use MSn Info: yes  
 Max Isotopes: all  
 Isotope RI (%): 1.00  
 Isotope Res: 10000  
 MSn Iso RI (%): 75.00  
 MSn Logic Mode: OR  
 Max Results: 800

Event#: 1 MS(E+) Ret. Time : 0.170 -> 0.360 Scan#: 35 -> 73

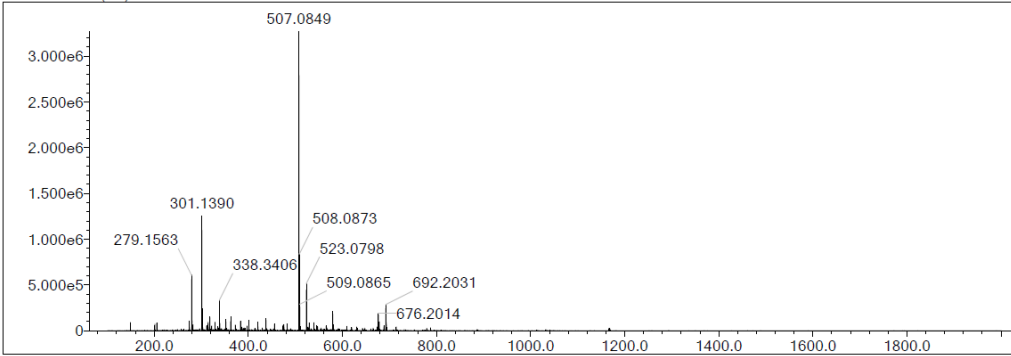

Measured region for 507.0849 m/z

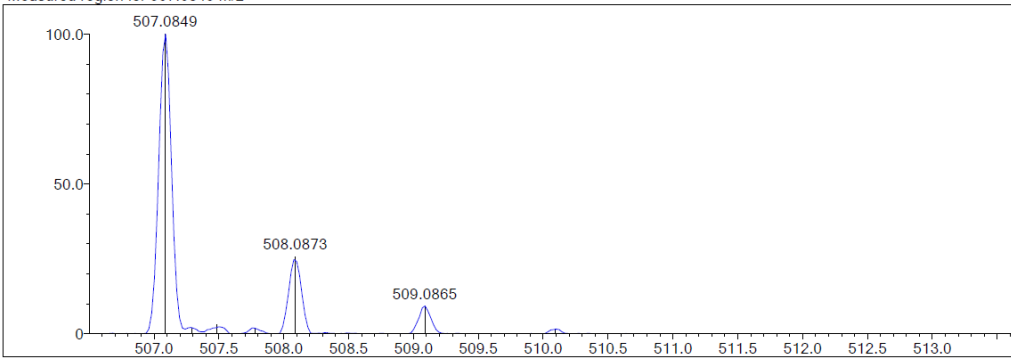

C21 H16 N2 O4 F6 S [M+H]<sup>+</sup> : Predicted region for 507.0808 m/z

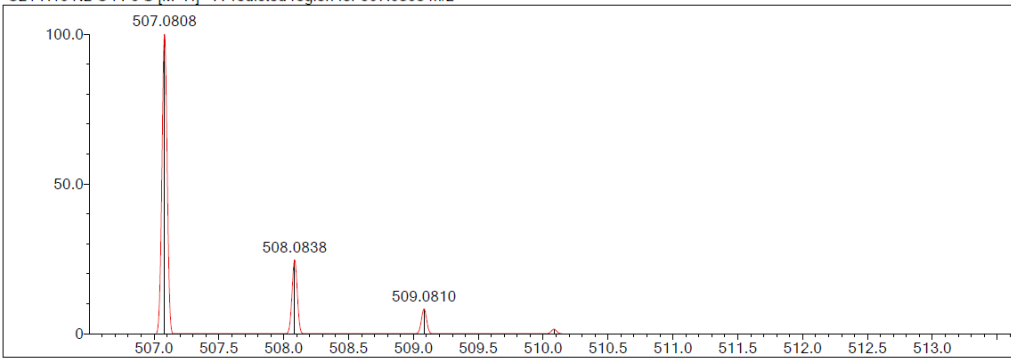

| Rank | Score | Ion                | Formula (M)        | Pred. m/z | Meas. m/z | Df. (mDa) | Df. (ppm) | Iso   | DBE  |
|------|-------|--------------------|--------------------|-----------|-----------|-----------|-----------|-------|------|
| 43   | 50.14 | [M+H] <sup>+</sup> | C21 H16 N2 O4 F6 S | 507.0808  | 507.0849  | 4.1       | 8.09      | 84.84 | 12.0 |

Compound 9 HR MS

Data File: D:\分子量测定\2015\2015-01-25\2015-01-25WLJ\_62\_29.lcd

| Elmt | Val. | Min | Max | Use Adduct |
|------|------|-----|-----|------|------|-----|-----|------|------|-----|-----|------|------|-----|-----|------------|
| H    | 1    | 0   | 100 | N    | 3    | 0   | 6   | P    | 3    | 0   | 0   | Br   | 1    | 0   | 2   | H          |
| B    | 3    | 0   | 0   | O    | 2    | 0   | 50  | S    | 2    | 0   | 1   | I    | 3    | 0   | 0   |            |
| C    | 4    | 19  | 50  | F    | 1    | 0   | 6   | Cl   | 1    | 0   | 0   |      |      |     |     |            |

Error Margin (mDa): 20.0  
 DBE Range: 0.0 - 30.0  
 Electron Ions: both  
 HC Ratio: 0.0 - 3.0  
 Apply N Rule: yes  
 Use MSn Info: yes  
 Max Isotopes: all  
 Isotope RI (%): 1.00  
 Isotope Res: 10000  
 MSn Iso RI (%): 75.00  
 MSn Logic Mode: OR  
 Max Results: 800

Event#: 2 MS(E-) Ret. Time : 0.160 -> 0.390 Scan#: 34 -> 80

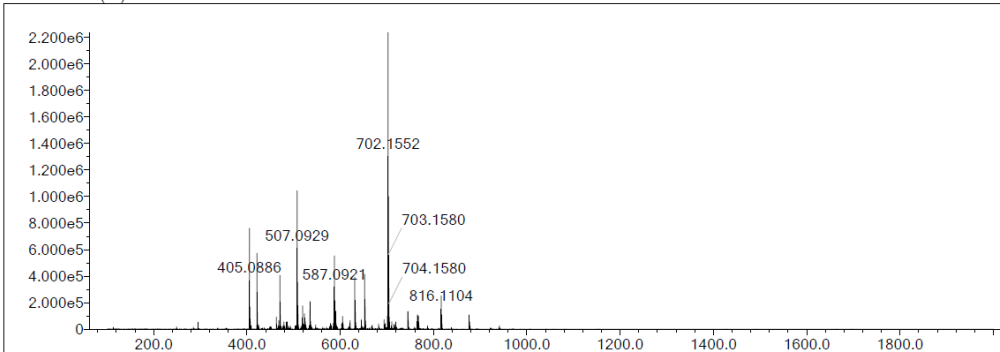

Measured region for 405.0886 m/z

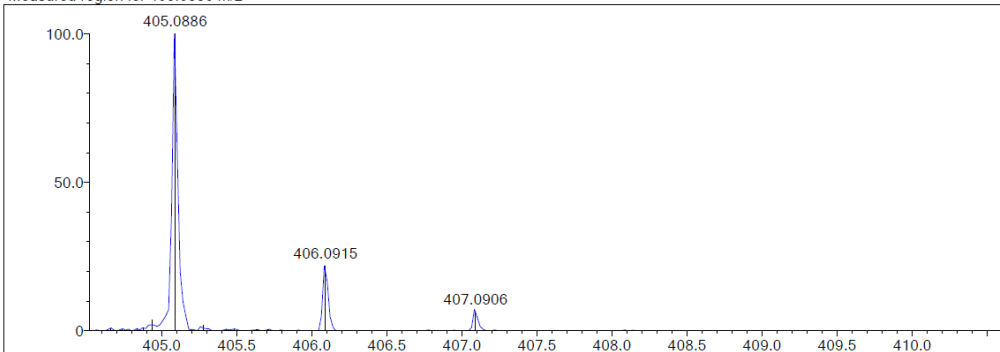

C19 H16 N2 O4 F2 S [M-H]- : Predicted region for 405.0726 m/z

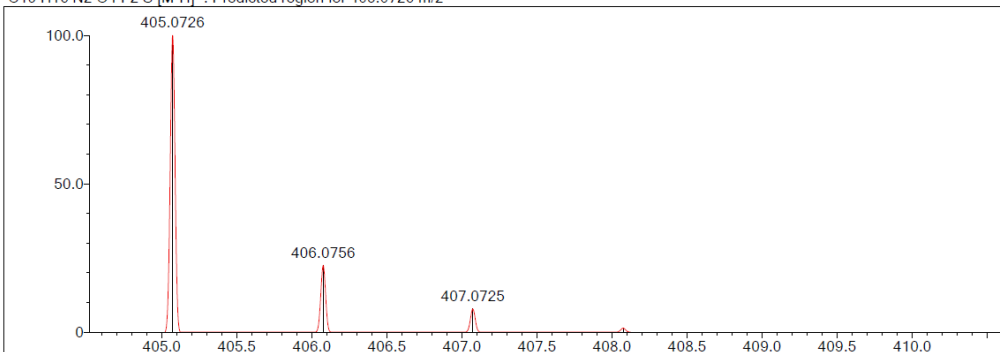

| Rank | Score | Ion    | Formula (M)        | Pred. m/z | Meas. m/z | Df. (mDa) | Df. (ppm) | Iso   | DBE  |
|------|-------|--------|--------------------|-----------|-----------|-----------|-----------|-------|------|
| 84   | 0.00  | [M-H]- | C19 H16 N2 O4 F2 S | 405.0726  | 405.0886  | 16.0      | 39.50     | 14.27 | 12.0 |

Compound 10 HR MS

Data File: D:\分子量测定\2015\2015-01-25\2015-01-25WLJ\_63\_9.lcd

| Elmt | Val. | Min | Max | Use Adduct |
|------|------|-----|-----|------|------|-----|-----|------|------|-----|-----|------|------|-----|-----|------------|
| H    | 1    | 0   | 100 | N    | 3    | 0   | 5   | P    | 3    | 0   | 0   | Br   | 1    | 0   | 2   | H          |
| B    | 3    | 0   | 0   | O    | 2    | 0   | 50  | S    | 2    | 0   | 1   | I    | 3    | 0   | 0   |            |
| C    | 4    | 19  | 50  | F    | 1    | 0   | 1   | Cl   | 1    | 0   | 0   |      |      |     |     |            |

Error Margin (mDa): 20.0  
 HC Ratio: 0.0 - 3.0  
 Max Isotopes: all  
 MSn Iso RI (%): 75.00

DBE Range: 0.0 - 30.0  
 Apply N Rule: yes  
 Isotope RI (%): 1.00  
 MSn Logic Mode: OR

Electron Ions: both  
 Use MSn Info: yes  
 Isotope Res: 10000  
 Max Results: 800

Event#: 1 MS(E+) Ret. Time : 0.150 -> 0.350 Scan#: 31 -> 71

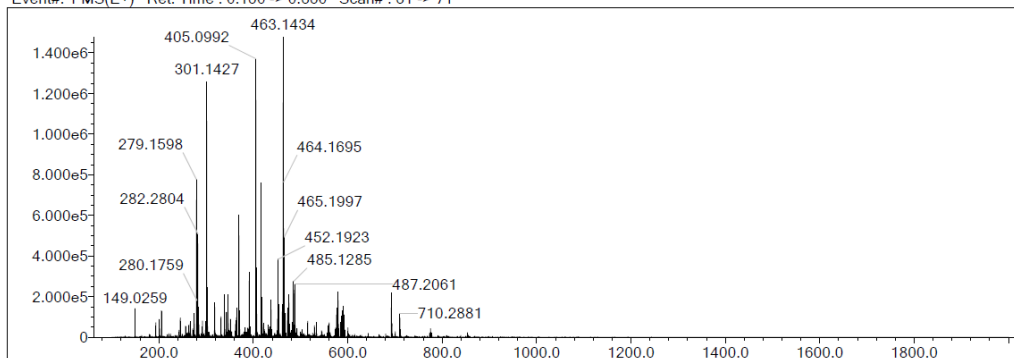

Measured region for 405.0992 m/z

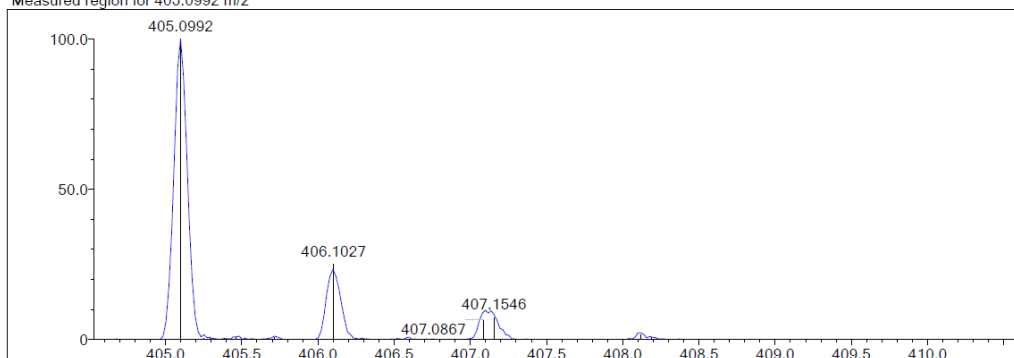

C19 H17 N2 O5 F S [M+H]+ : Predicted region for 405.0915 m/z

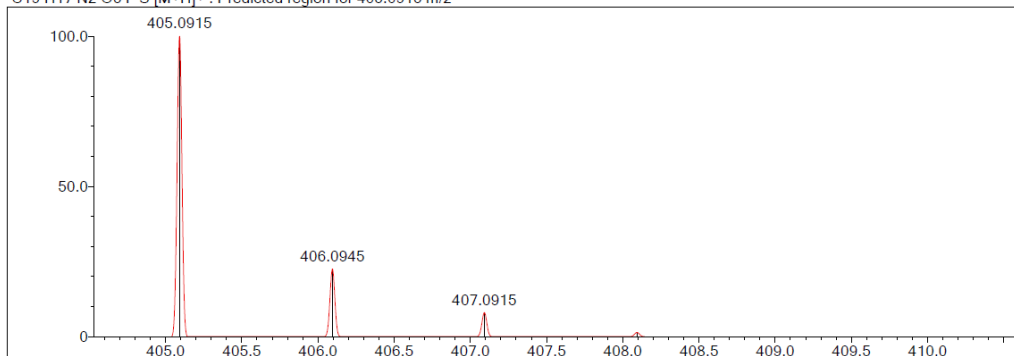

| Rank | Score | Ion                | Formula (M)       | Pred. m/z | Meas. m/z | Df. (mDa) | Df. (ppm) | Iso   | DBE  |
|------|-------|--------------------|-------------------|-----------|-----------|-----------|-----------|-------|------|
| 14   | 10.36 | [M+H] <sup>+</sup> | C19 H17 N2 O5 F S | 405.0915  | 405.0992  | 7.7       | 19.01     | 64.86 | 12.0 |

Compound 11 HR MS

Data File: D:\分子量测定\2015\2015-01-25\2015-01-25WLJ\_WLJ-64\_4.lcd

| Elmt | Val. | Min | Max | Use Adduct |
|------|------|-----|-----|------|------|-----|-----|------|------|-----|-----|------|------|-----|-----|------------|
| H    | 1    | 0   | 100 | N    | 3    | 0   | 5   | P    | 3    | 0   | 0   | Br   | 1    | 0   | 0   | H          |
| B    | 3    | 0   | 0   | O    | 2    | 0   | 50  | S    | 2    | 0   | 1   | I    | 3    | 0   | 0   |            |
| C    | 4    | 0   | 50  | F    | 1    | 0   | 6   | Cl   | 1    | 0   | 0   |      |      |     |     |            |

Error Margin (mDa): 10.0      DBE Range: 0.0 - 30.0      Electron Ions: both  
 HC Ratio: 0.0 - 3.0      Apply N Rule: yes      Use MSn Info: yes  
 Max Isotopes: all      Isotope RI (%): 1.00      Isotope Res: 10000  
 MSn Iso RI (%): 75.00      MSn Logic Mode: OR      Max Results: 800

Event#: 1 MS(E+) Ret. Time : 0.230 Scan#: 47

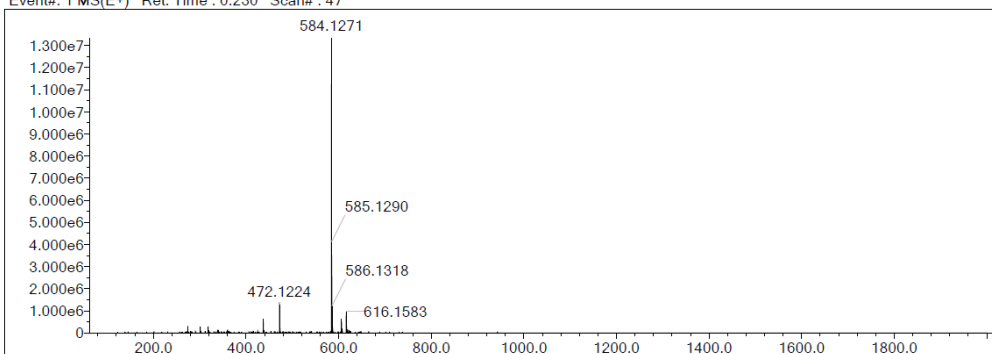

Measured region for 584.1271 m/z

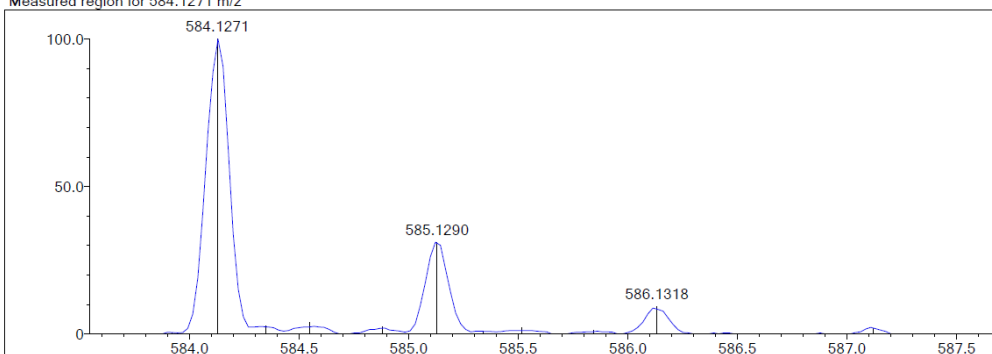

C25 H19 N5 O3 F6 S [M+H]+ : Predicted region for 584.1186 m/z

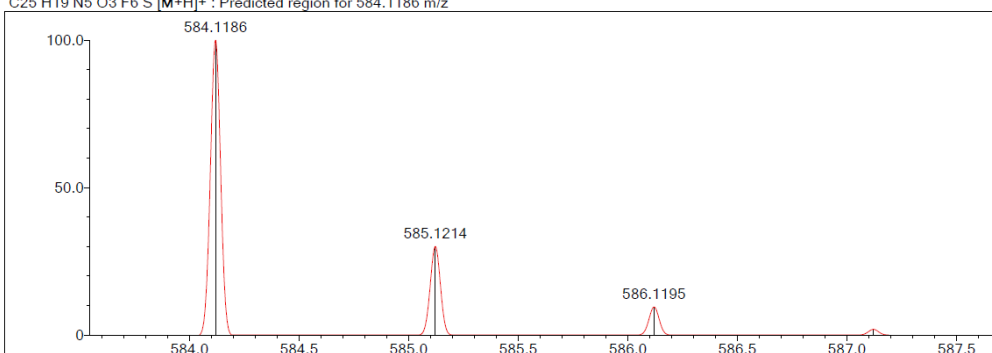

| Rank | Score | Ion                | Formula (M)        | Pred. m/z | Meas. m/z | Df. (mDa) | Df. (ppm) | Iso   | DBE  |
|------|-------|--------------------|--------------------|-----------|-----------|-----------|-----------|-------|------|
| 113  | 20.86 | [M+H] <sup>+</sup> | C25 H19 N5 O3 F6 S | 584.1186  | 584.1271  | 8.5       | 14.55     | 74.84 | 16.0 |

Compound 12 HR MS

Data File: D:\分子量测定\2015\2015-01-25\2015-01-25WLJ\_65\_35.lcd

| Elmt | Val. | Min | Max | Use Adduct |
|------|------|-----|-----|------|------|-----|-----|------|------|-----|-----|------|------|-----|-----|------------|
| H    | 1    | 0   | 100 | N    | 3    | 0   | 6   | P    | 3    | 0   | 0   | Br   | 1    | 0   | 2   | H          |
| B    | 3    | 0   | 0   | O    | 2    | 0   | 50  | S    | 2    | 0   | 1   | I    | 3    | 0   | 0   |            |
| C    | 4    | 19  | 50  | F    | 1    | 0   | 6   | Cl   | 1    | 0   | 0   |      |      |     |     |            |

Error Margin (mDa): 20.0 DBE Range: 0.0 - 30.0 Electron Ions: both  
 HC Ratio: 0.0 - 3.0 Apply N Rule: yes Use MSn Info: yes  
 Max Isotopes: all Isotope RI (%): 1.00 Isotope Res: 10000  
 MSn Iso RI (%): 75.00 MSn Logic Mode: OR Max Results: 800

Event#: 1 MS(E+) Ret. Time : 0.150 -> 0.320 Scan#: 31 -> 65

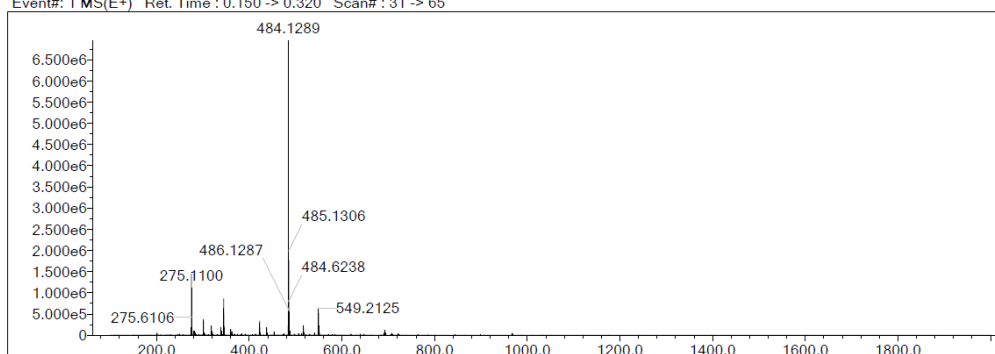

Measured region for 484.1289 m/z

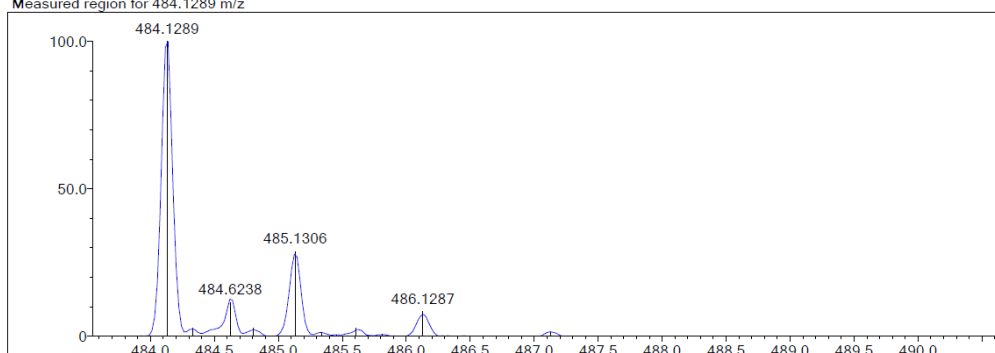

C23 H19 N5 O3 F2 S [M+H]<sup>+</sup> : Predicted region for 484.1249 m/z

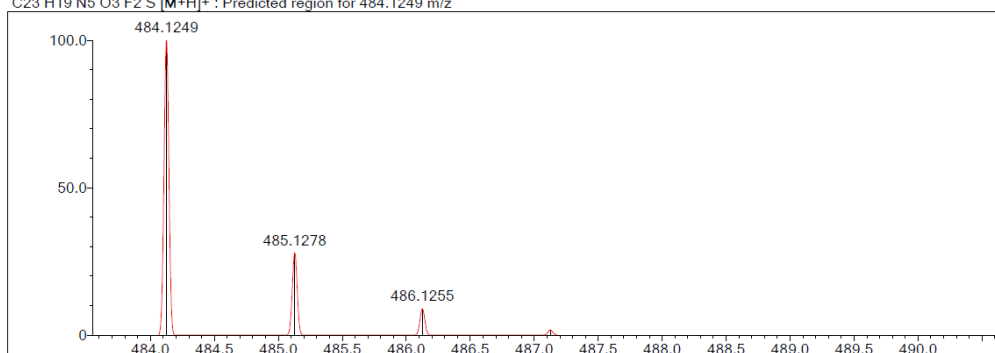

| Rank | Score | Ion                | Formula (M)        | Pred. m/z | Meas. m/z | Df. (mDa) | Df. (ppm) | Iso   | DBE  |
|------|-------|--------------------|--------------------|-----------|-----------|-----------|-----------|-------|------|
| 22   | 53.28 | [M+H] <sup>+</sup> | C23 H19 N5 O3 F2 S | 484.1249  | 484.1289  | 4.0       | 8.26      | 92.81 | 16.0 |

Compound 13 HR MS

Data File: D:\分子量测定\2015\2015-01-25\2015-01-25WLJ\_66\_7.lcd

| Elmt | Val. | Min | Max | Use Adduct |
|------|------|-----|-----|------|------|-----|-----|------|------|-----|-----|------|------|-----|-----|------------|
| H    | 1    | 0   | 100 | N    | 3    | 0   | 5   | P    | 3    | 0   | 0   | Br   | 1    | 0   | 2   | H          |
| B    | 3    | 0   | 0   | O    | 2    | 0   | 50  | S    | 2    | 0   | 1   | I    | 3    | 0   | 0   |            |
| C    | 4    | 19  | 50  | F    | 1    | 0   | 1   | Cl   | 1    | 0   | 0   |      |      |     |     |            |

Error Margin (mDa): 20.0  
 HC Ratio: 0.0 - 3.0  
 Max Isotopes: all  
 MSn Iso RI (%): 75.00

DBE Range: 0.0 - 30.0  
 Apply N Rule: yes  
 Isotope RI (%): 1.00  
 MSn Logic Mode: OR

Electron Ions: both  
 Use MSn Info: yes  
 Isotope Res: 10000  
 Max Results: 800

Event#: 1 MS(E+) Ret. Time : 0.220 Scan#: 45

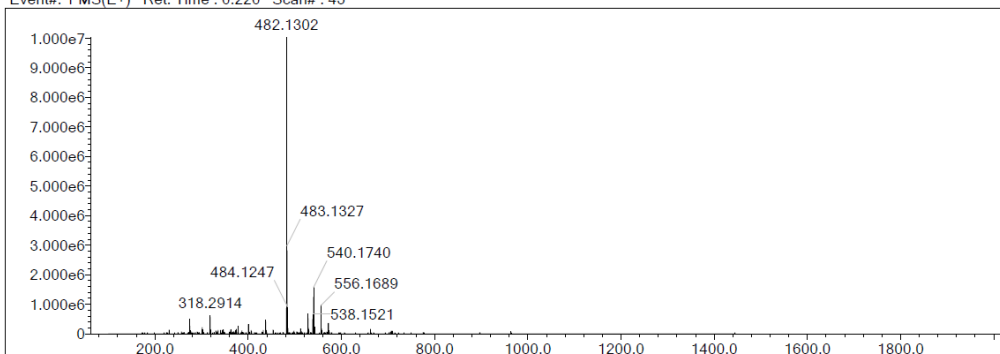

Measured region for 482.1302 m/z

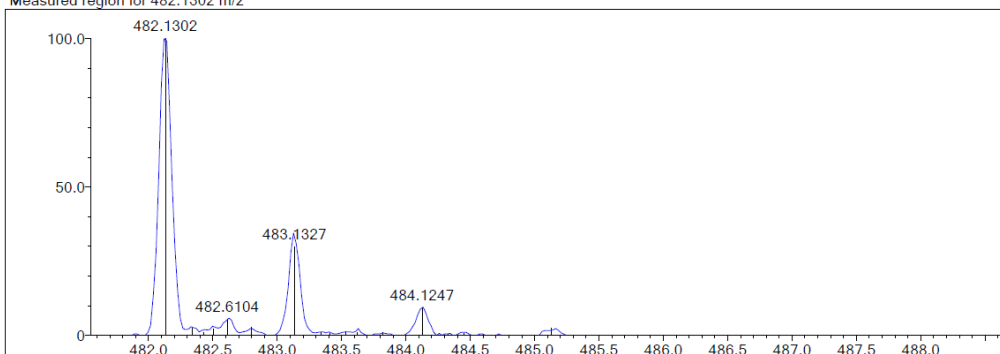

C23 H20 N5 O4 F S [M+H]<sup>+</sup> : Predicted region for 482.1293 m/z

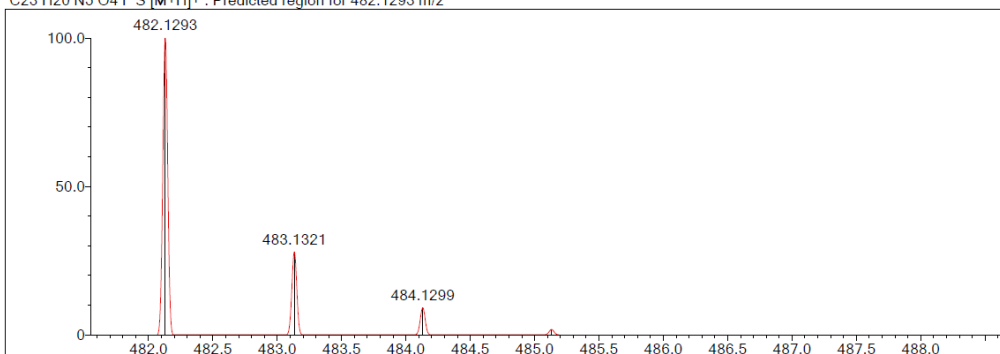

| Rank | Score | Ion                | Formula (M)                                                       | Pred. m/z | Meas. m/z | Df. (mDa) | Df. (ppm) | Iso   | DBE  |
|------|-------|--------------------|-------------------------------------------------------------------|-----------|-----------|-----------|-----------|-------|------|
| 8    | 43.32 | [M+H] <sup>+</sup> | C <sub>23</sub> H <sub>20</sub> N <sub>5</sub> O <sub>4</sub> F S | 482.1293  | 482.1302  | 0.9       | 1.87      | 44.28 | 16.0 |

Compound 14 HR MS
